# Supplementary material
Source: PubMed Central journal article supplement (PMC11041662)

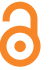

---

# Systems immunology-based drug repurposing framework to target inflammation in atherosclerosis

---

In the format provided by the authors and unedited

---

**Supplementary Data Figure 1. Phospho-CyTOF analysis of intracellular signaling in healthy PBMCs stimulated with either atherosclerotic or healthy plasma.** Dot plots show the effect of atherosclerotic plasma (athero, n=20 biologically independent samples; males=10), healthy plasma (healthy, n=10 biologically independent samples) or no stimulation (no plasma, n=5 biologically independent samples) on the phosphorylation of intracellular kinases in **A.** CD14<sup>+</sup> monocytes, **B.** CD1c<sup>+</sup> DCs, **C.** CD16<sup>+</sup> monocytes, **D.** CD4<sup>+</sup> T cells and **E.** CD8<sup>+</sup> T cells from healthy PBMCs. P values were determined by one-way ANOVA with Tukey's post hoc test across all groups.

A

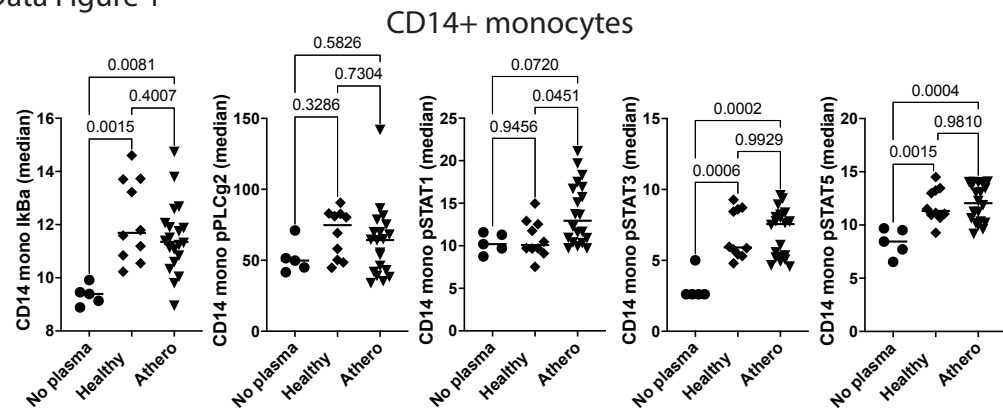

B

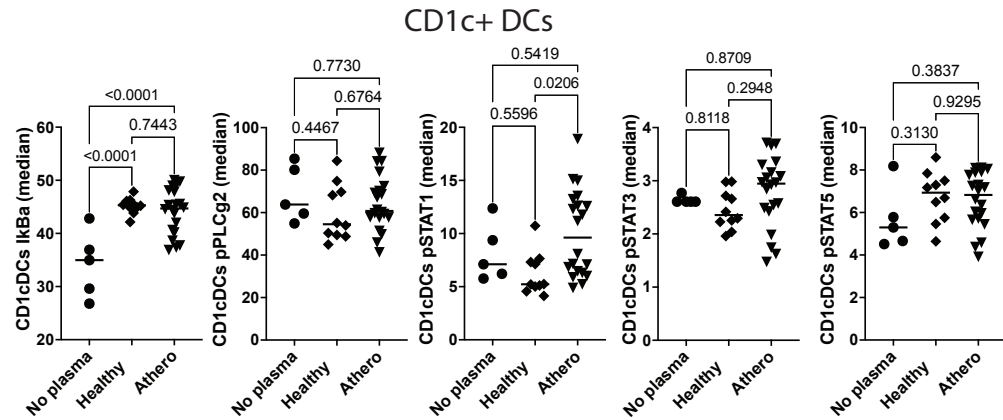

C

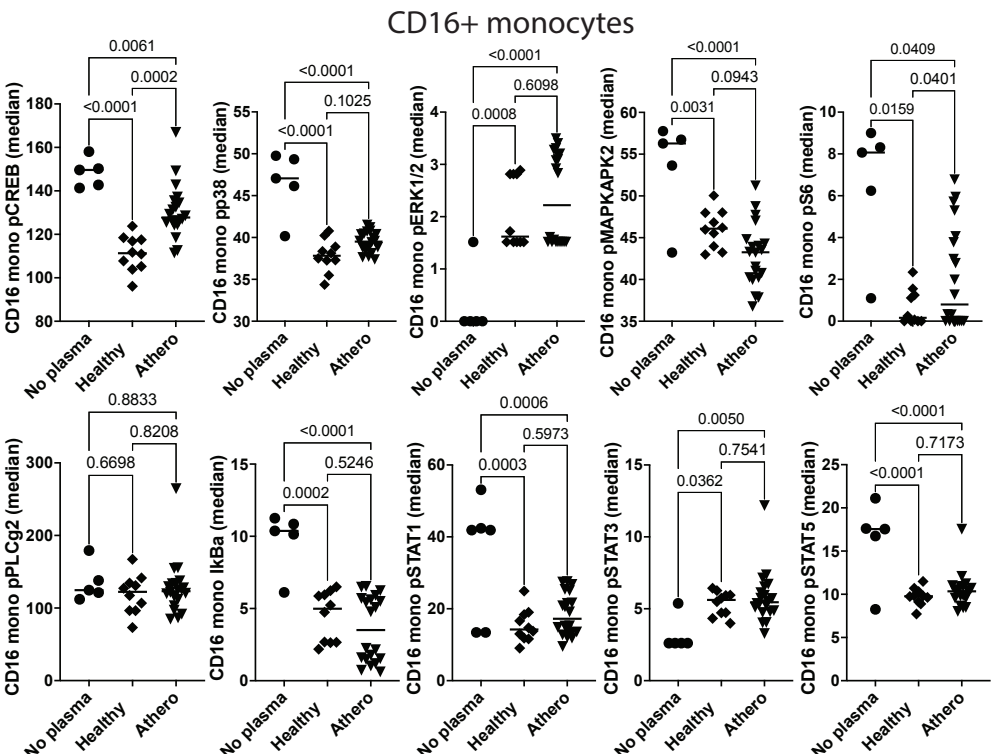

D

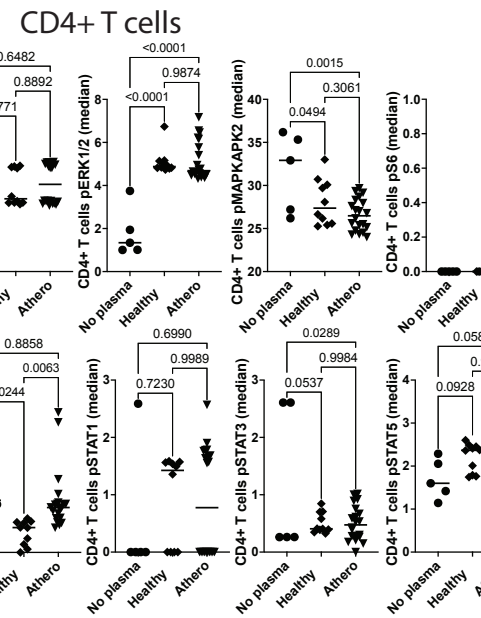

E

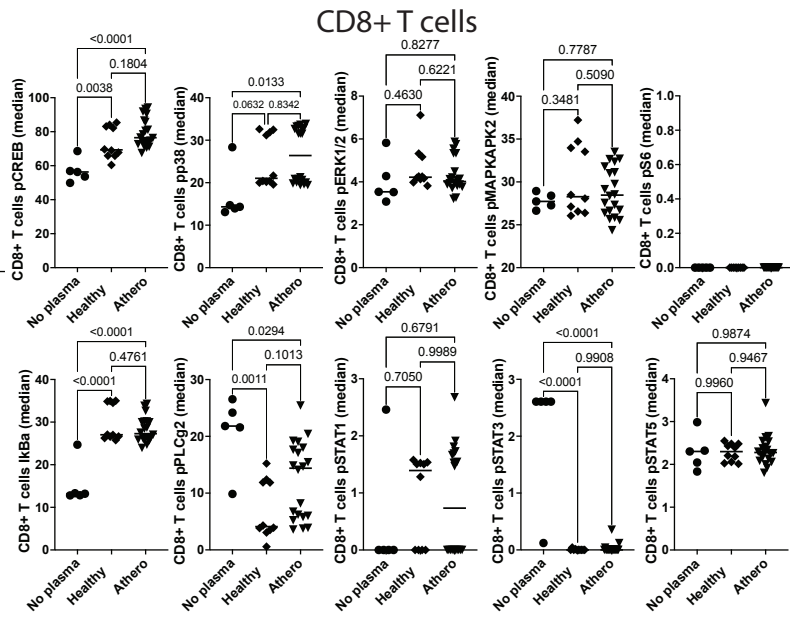

**Supplementary Data Figure 2. Phospho-CyTOF analysis of intracellular signaling in PBMCs from atherosclerotic patients stimulated with either autologous or healthy plasma.** Dot plots show the effect of autologous atheroplasma (auto, n=9 biologically independent samples; males=5) vs. healthy plasma (healthy, n=9 biologically independent samples) or no stimulation (no plasma, n=10 biologically independent samples; males=6) on the phosphorylation of intracellular kinases in **A.** CD14<sup>+</sup> monocytes, **B.** CD1c<sup>+</sup> DCs, **C.** CD16<sup>+</sup> monocytes, **D.** CD4<sup>+</sup> T cells and **E.** CD8<sup>+</sup> T cells in PBMCs from atherosclerotic patients. P values were determined by one-way ANOVA with Tukey's post hoc test across all groups.

A

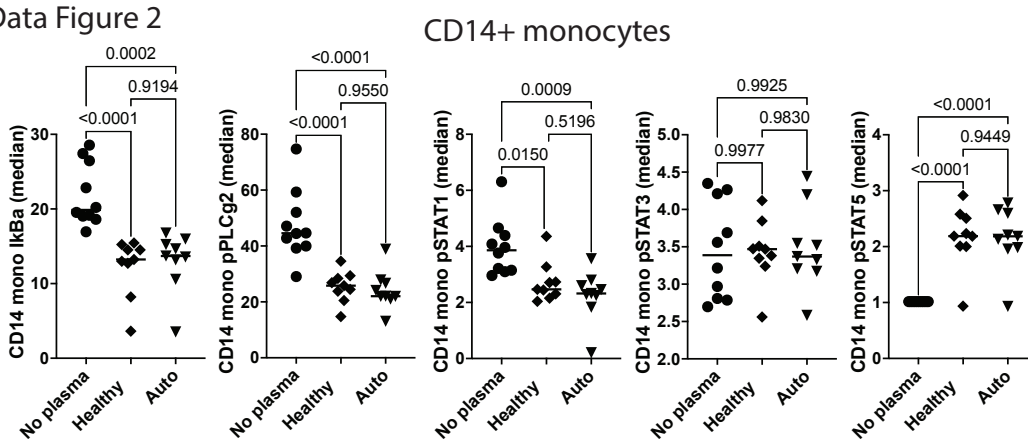

B

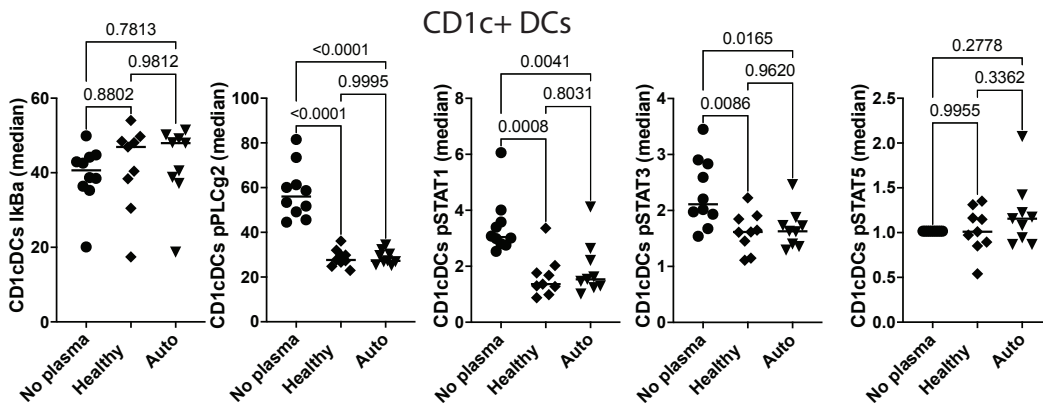

C

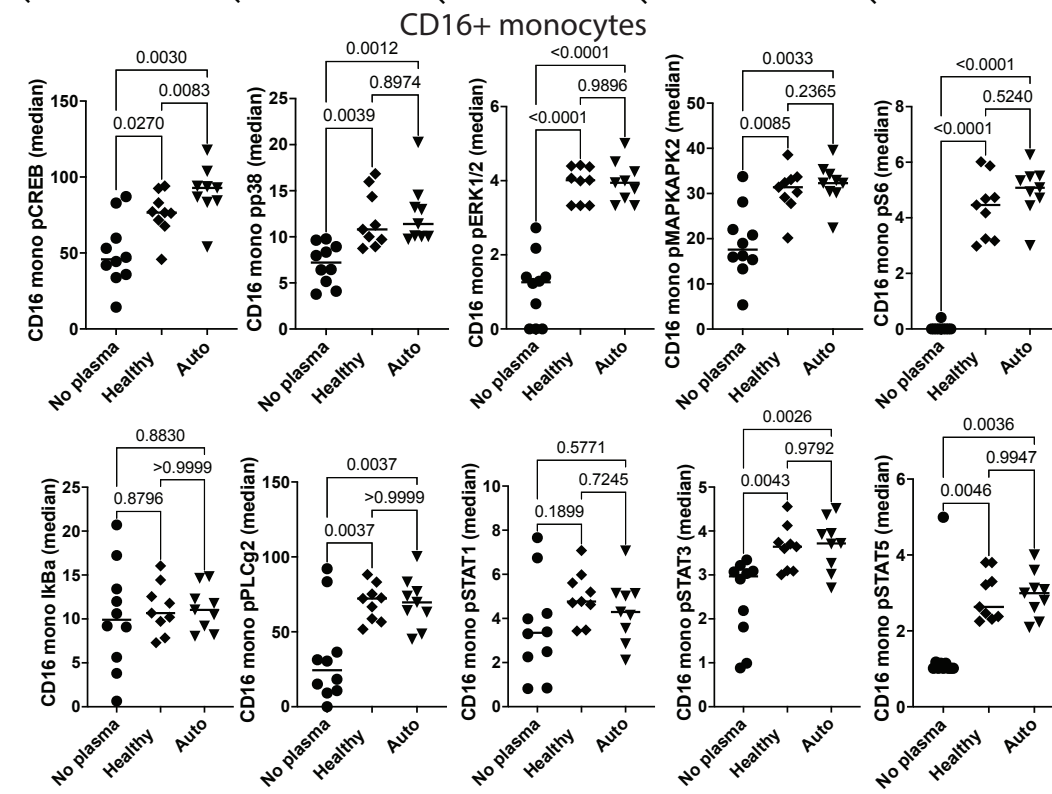

D

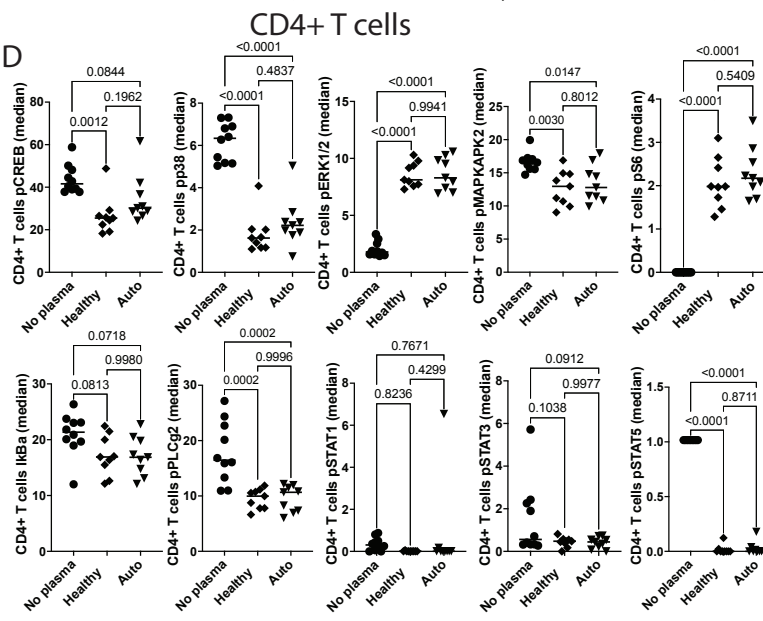

E

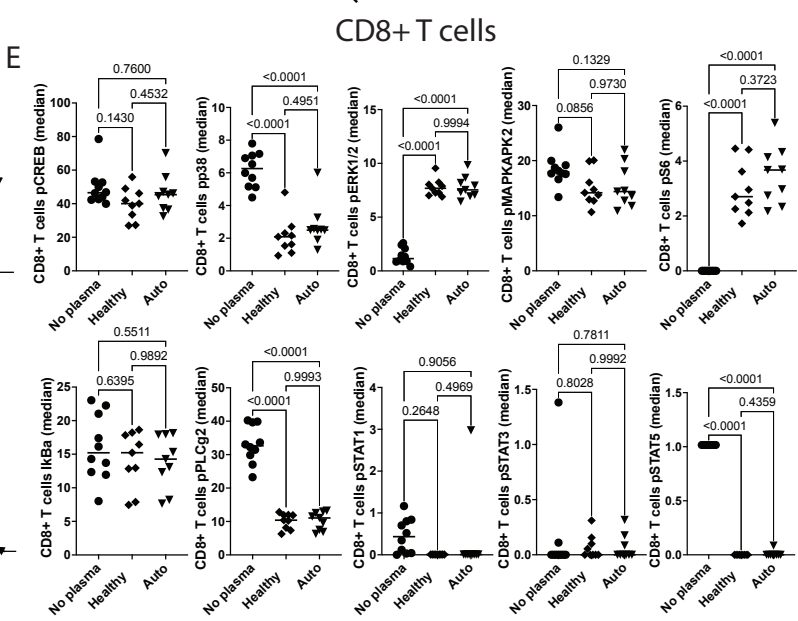

**Supplementary Data Figure 3. Phospho-CyTOF analysis of intracellular signaling in CD14<sup>+</sup> monocytes, CD1c<sup>+</sup> DCs and CD16<sup>+</sup> monocytes subpopulations of healthy PBMCs stimulated with oxLDL.** Dot plots show the effect of oxLDL (50µg/ml), atherosclerotic plasma (athero), atherosclerotic plasma + oxLDL (athero+oxLDL), or no stimulation on the phosphorylation of intracellular kinases in **A.** CD14<sup>+</sup> monocytes, **B.** CD1c<sup>+</sup> DCs and **C.** CD16<sup>+</sup> monocytes in PBMCs from healthy donors. N=4 biologically independent samples/condition. P values were determined by one-way ANOVA with Tukey's post hoc test across all groups.

A

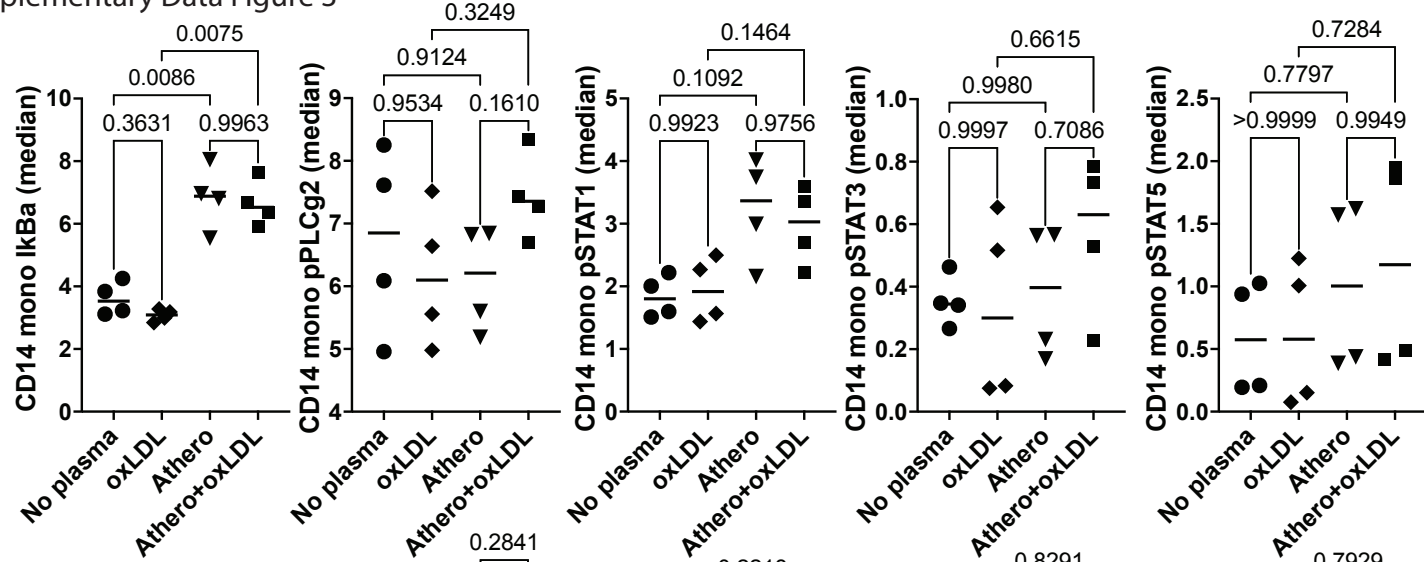

B

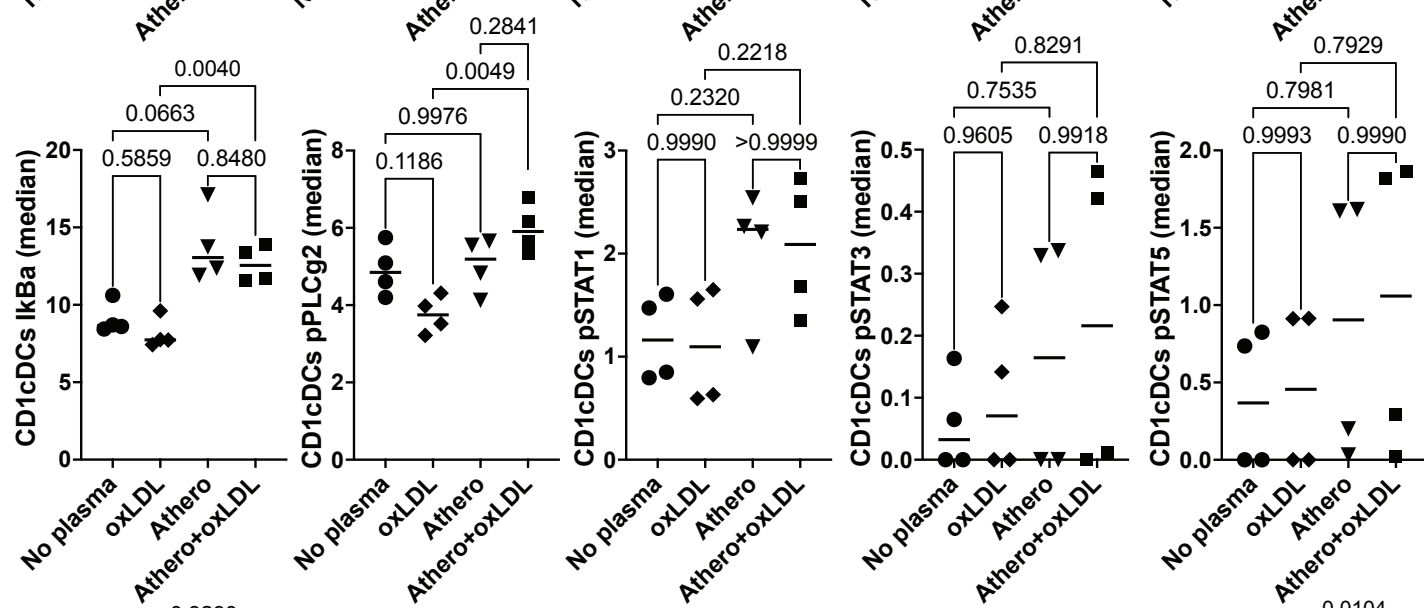

C

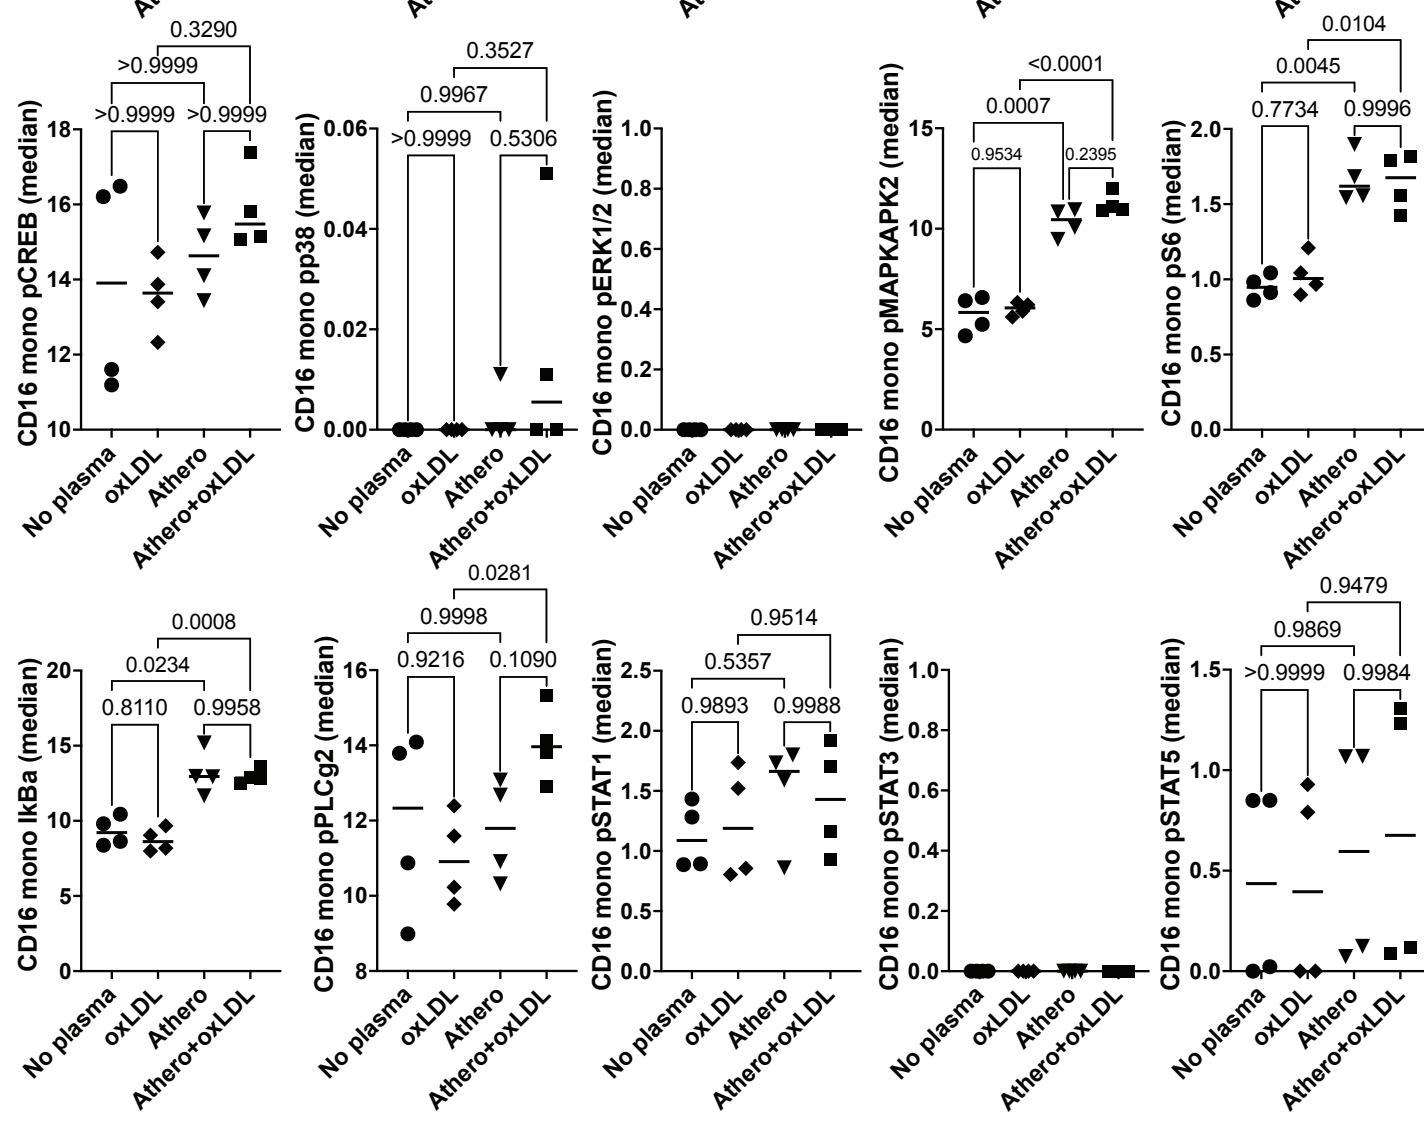

**Supplementary Data Figure 4. Phospho-CyTOF analysis of intracellular signaling in CD4+ T cells and CD8+ T cells subpopulations of healthy PBMCs stimulated with atherosclerotic plasma in presence of oxLDL.** Dot plots show the effect of oxLDL (50µg/ml), atherosclerotic plasma (athero), atherosclerotic plasma + oxLDL (athero+oxLDL), or no stimulation on the phosphorylation of intracellular kinases in **A.** CD4+ T cells and **B.** CD8+ T cells. N=4 biologically independent samples/condition. P values were determined by one-way ANOVA with Tukey's post hoc test across all groups.



A

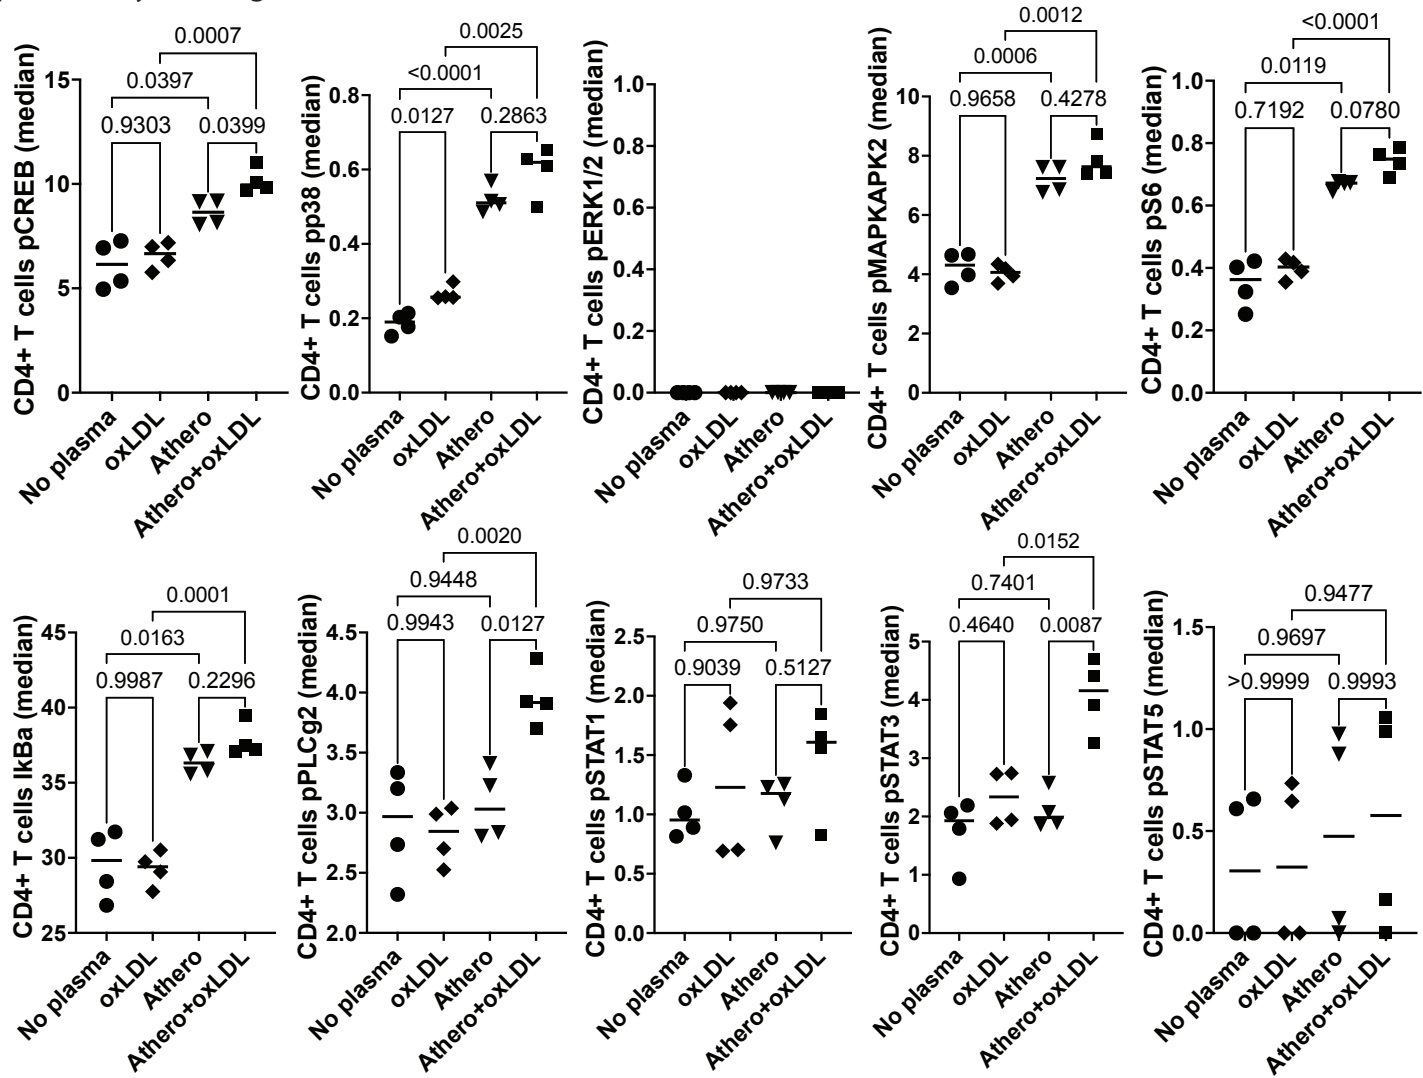

B

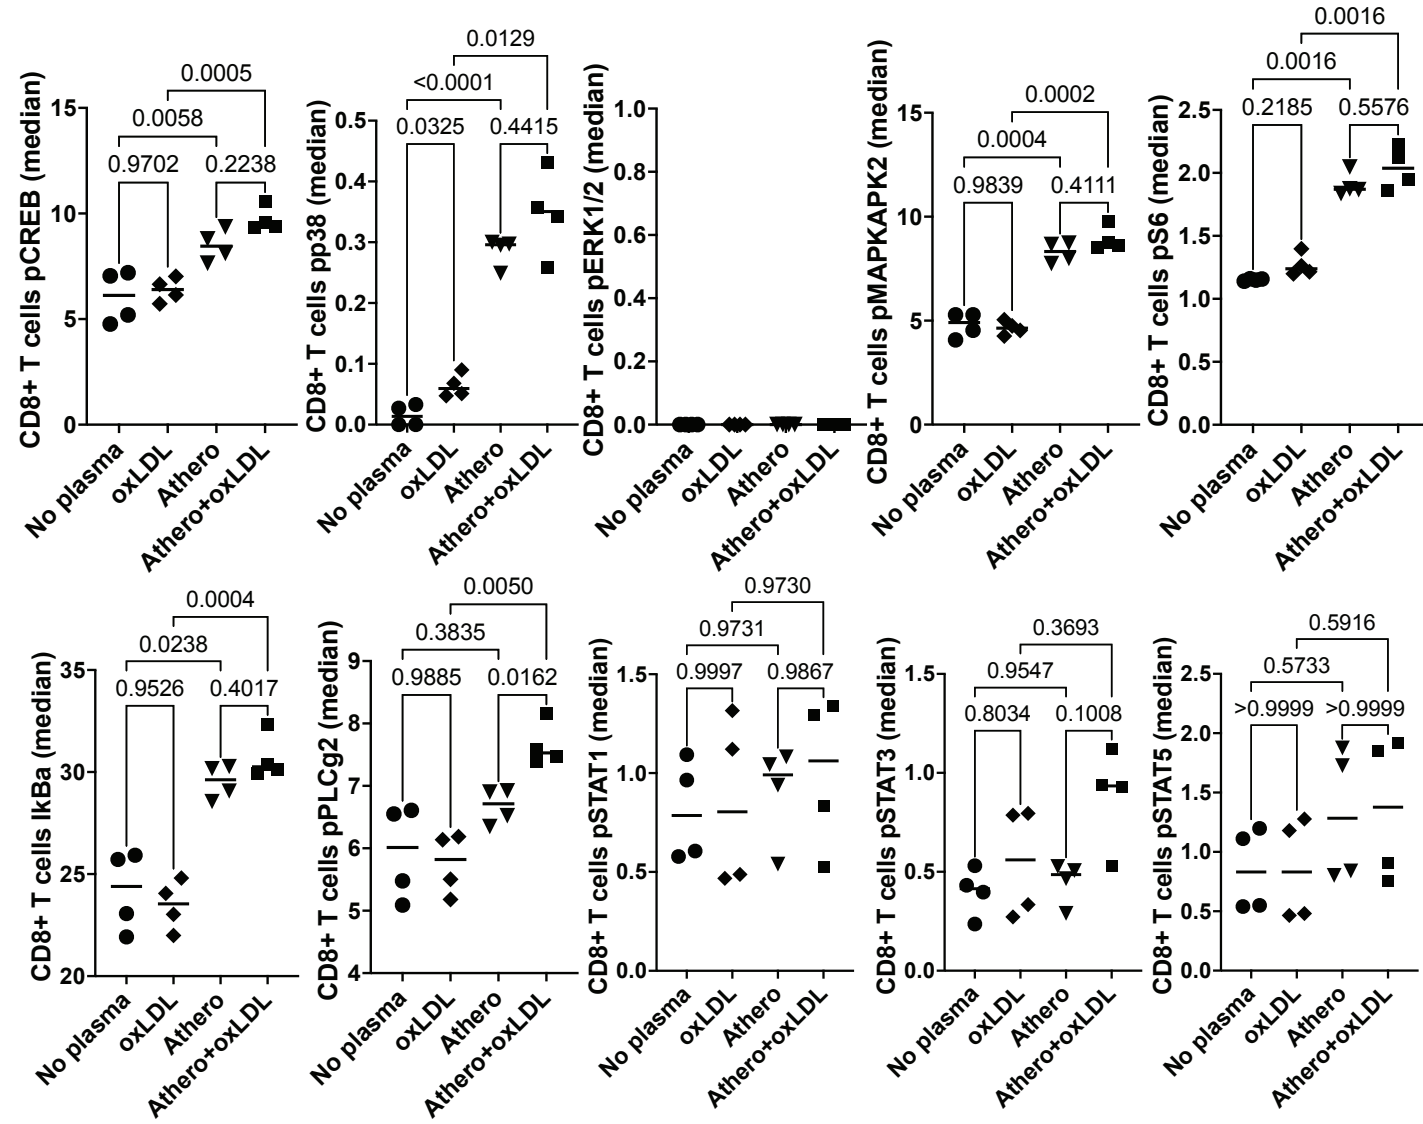

**Supplementary Data Figure 5. Effects of saracatinib on intracellular signaling and metabolic pathways induced by autologous atheroplasma in PBMCs from patients and in bone marrow derived mouse macrophages.**

**A.** Half maximal inhibitory concentration values (IC<sub>50</sub>) of saracatinib (expressed as log<sub>2</sub> values) used to treat CD14<sup>+</sup> monocytes exposed to plasma from atherosclerotic patients and analyzed by CyTOF to measure the inhibition of each phosphosite induced by saracatinib (% signal reduction). **B.** Effect of saracatinib (25 μM) on CD14<sup>+</sup> monocytes and DCs from patients with coronary artery disease (CAD, n=5 biologically independent samples; males=3) or carotid artery disease (CEA, n=5 biologically independent samples; males=3) measured as the % of change in phospho-signaling by CyTOF. P-values were determined using Welch's unpaired t-test, two-tailed. **C.** Oxygen consumption rate (OCR) and respiratory parameters in bone marrow derived mouse macrophages treated with vehicle (DMSO) or saracatinib (sara) 0.1-1-10μM and summary of respiratory parameters: Basal OCR, Adenosine 5'-triphosphate (ATP) production, Spare Respiratory capacity (Spare Resp Cap): DMSO, n=5; saracatinib 0.1μM, n=5; saracatinib 1μM, n=5; saracatinib 10μM, n=4 biologically independent samples. Maximal Respiratory OCR: DMSO, n=5; saracatinib 0.1μM, n=5; saracatinib 1μM, n=5; saracatinib 10μM, n=5 biologically independent samples. P values were determined by one-way ANOVA with Dunnet's post hoc test vs vehicle. Data are presented as mean values +/- SD.

**D.** Oxygen consumption rate (OCR) and respiratory parameters in bone marrow derived mouse macrophages treated with vehicle plus oxLDL (DMSO+ oxLDL) or saracatinib (sara, 0.1-1-10μM) + oxLDL and summary of respiratory parameters in bone marrow derived mouse macrophages: Basal OCR: DMSO+oxLDL, n=4; saracatinib 0.1μM+oxLDL, n=5; saracatinib 1μM+oxLDL, n=5; saracatinib 10μM+oxLDL, n=5 biologically independent samples. Adenosine 5'-triphosphate (ATP) production, Maximal Respiratory OCR, Spare Respiratory capacity (Spare Resp Cap): DMSO+oxLDL, n=5; saracatinib 0.1μM+oxLDL, n=5; saracatinib 1μM+oxLDL, n=5; saracatinib 10μM+oxLDL, n=5 biologically independent samples. P values were determined by one-way ANOVA with Dunnet's post hoc test vs vehicle. Data are presented as mean values +/- SD.

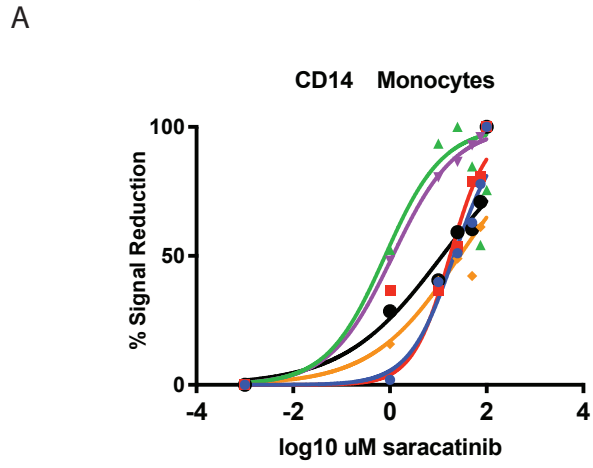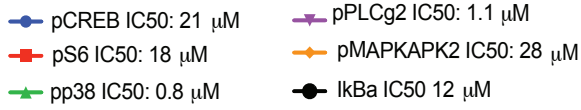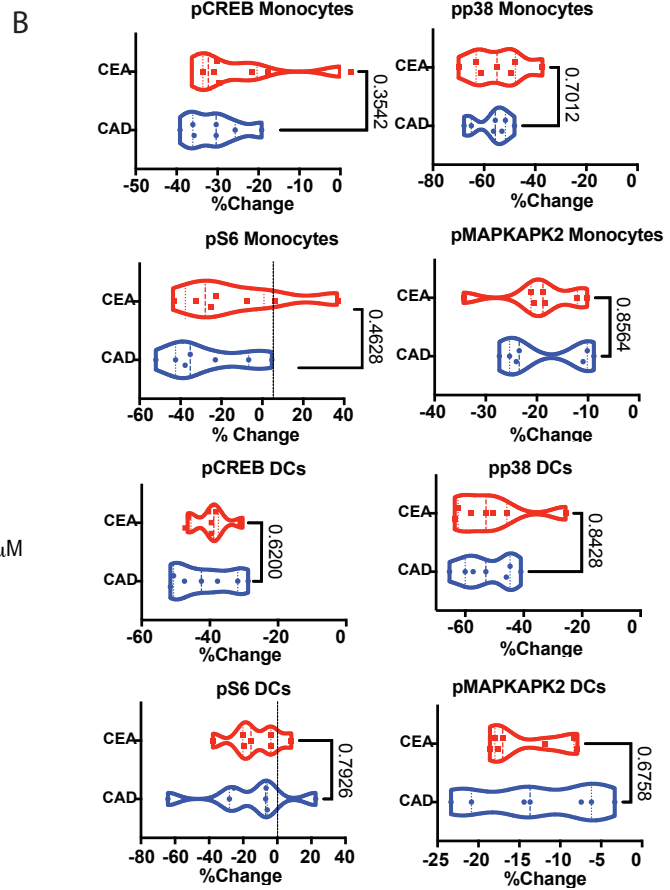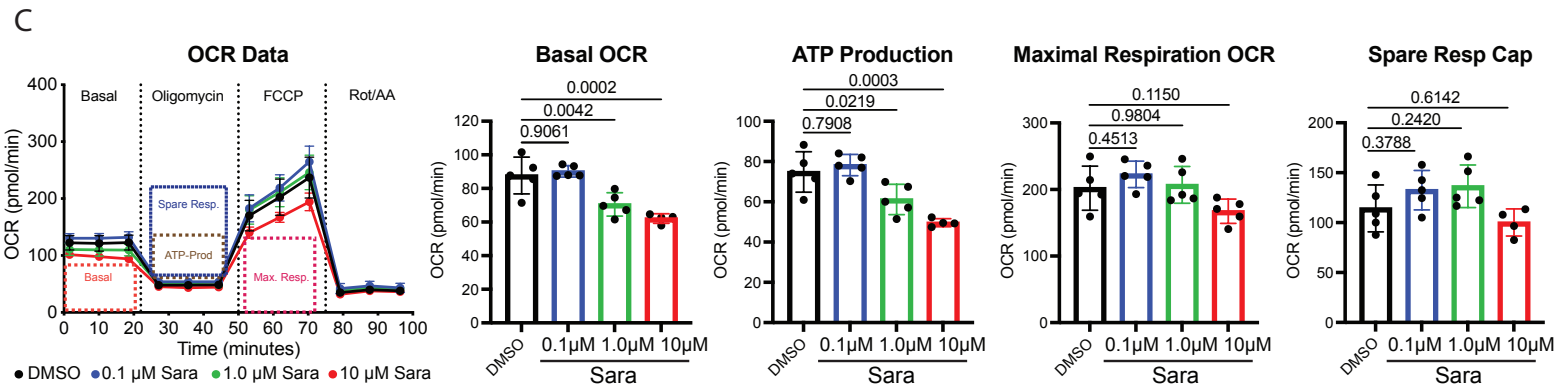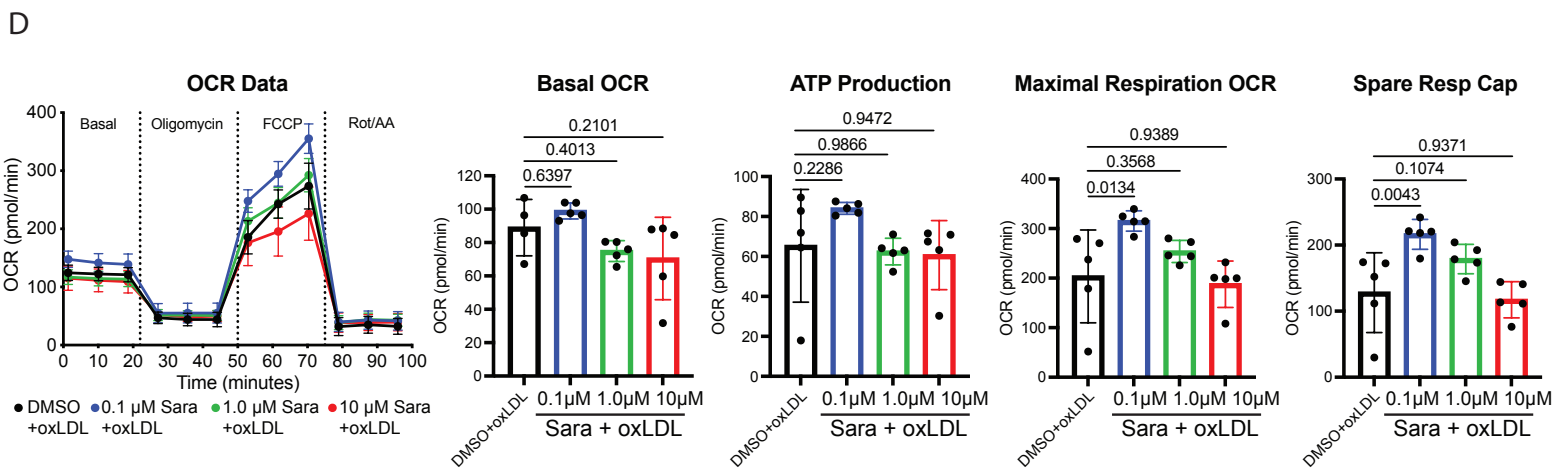

**Supplementary Data Figure 6. Flow diagram of rabbit study.** The flow diagram depicts the experimental design of the rabbit study and shows animals that were included and excluded as part of the study.

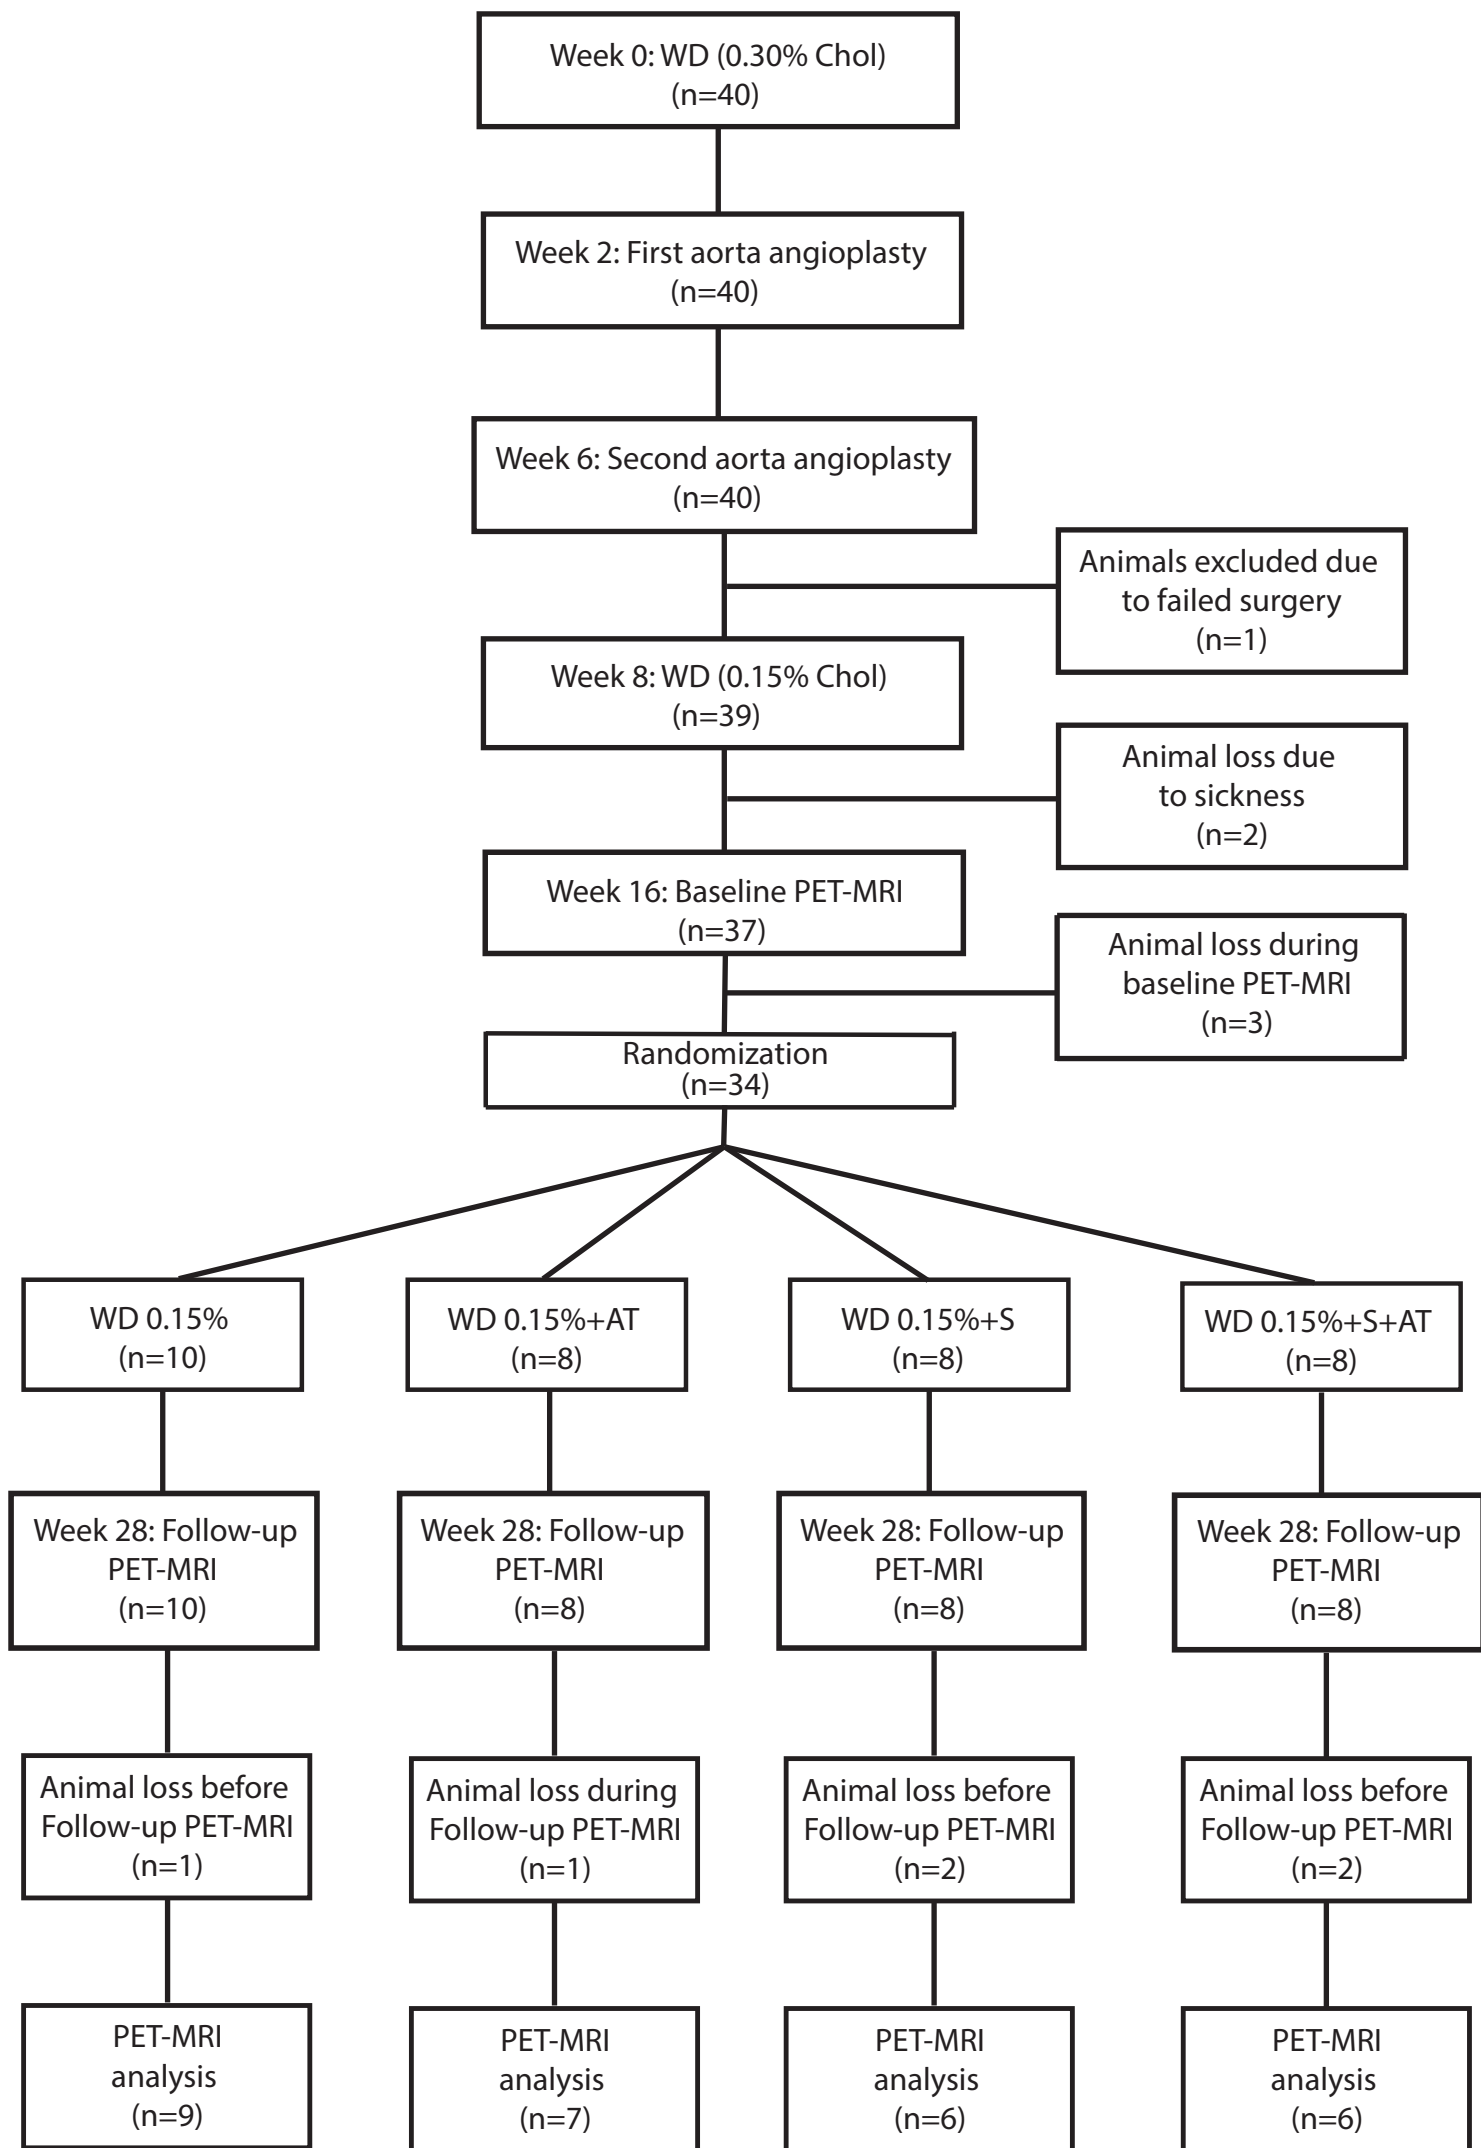

Supplement: 44161_2023_278_MOESM1_ESM.pdf [file 44161_2023_278_MOESM1_ESM.pdf]
